# Supplementary material for: The Peptide Chain Release Factor Methyltransferase PrmC Influences the Pseudomonas aeruginosa PA14 Endo- and Exometabolome
Source: Metabolites. 2020 Oct 18;10(10):417. doi: 10.3390/metabo10100417 (PMC7650828; doi:10.3390/metabo10100417)
Supplement: Supplementary file 1 [file metabolites-10-00417-s001.xlsx]

## Sheet: Supplementary Table 1
Supplementary Table 1: Feature table of the GC-MS data.
metabolite	library hit	retention index	retention time (min)	directional fold change	corrected p-value
unknown	Unknown#1031.8-pae-bth_008	1052.4	5.3	-1.04	0.952
2-hydroxypyridine	Pyridine,_2-hydroxy-_(1TMS)_1032.4	1059.4	5.4	-1.41	0.462
lactate	Lactic_acid_(2TMS)_1062.9	1078.4	5.7	6.67	0.00465
glycolate	Glycolic_acid_(2TMS)_1083	1084.9	5.8	1.91	0.451
alanine	Alanine_(2TMS)_1106.8	1111.6	6.3	1.59	0.451
oxalate	Oxalic_acid_(2TMS)_1139.3	1140.1	6.7	-1.09	0.87
glycine	Glycine_(2TMS)_1126.6	1140.1	6.7	1.63	0.451
unknown	Unknown#1169.8-pae-bth_013	1168	7.2	-1.25	0.483
leucine	Leucine_(1TMS)_1162.15	1176.4	7.3	-1.45	0.563
monomethylphosphate	Phosphoric_acid_monomethyl_ester_(2TMS)_1177.5	1193.1	7.6	-1.6	0.554
valine	Valine_(2TMS)_1214.5	1223	8.1	1.41	0.533
diethylenglycol	Diethylenglycol_(2TMS)_1248	1253.3	8.6	1.01	0.959
benzoate	Benzoic_acid,_(1TMS)_1249.7	1259.8	8.7	-3.02	0.533
unknown	Unknown#1248.7-cgl-sst_008	1263.7	8.7	2.02	0.483
ethanolamine	Ethanolamine_(3TMS)_1269.07	1267.2	8.8	1.11	0.714
glycerol	Glycerol_(3TMS)_1282.1	1275.8	8.9	1.85	0.505
phosphate	Phosphoric_acid_(3TMS)_1278.2	1282.3	9	1.08	0.828
nicotinate	Nicotinic_acid_(1TMS)_1300.27	1314.5	9.5	-5.01	2.8e-07
succinate	Succinic_acid_(2TMS)_1325.4	1324.8	9.7	-2.38	2.18e-08
glycerate	Glyceric_acid_(3TMS)_1343.4	1336.6	9.9	1.63	0.195
lumichrome	Lumichrome_(2MEOX)_1342.36	1341	10	-1.87	0.0386
uracil	Uracil_(2TMS)_1346.9	1344.8	10	1.21	0.337
fumarate	Fumaric_acid_(2TMS)_1362.4	1358.1	10.2	-1.27	0.39
nonanoate	Nonanoic_acid_(1TMS)_1371.8	1368.2	10.4	1.32	0.462
unknown	Unknown#1385.3-pae-bth_024	1385.9	10.7	1.09	0.834
thymine	Thymine_(2TMS)_1408.4	1403.3	11	-1.16	0.725
methionine	Methionine_(1TMS)_1413.7	1416.5	11.2	1.11	0.819
unknown	Unknown#1422-pae-bth_028	1422.1	11.3	1.72	0.403
aspartate	Aspartic_acid_(2TMS)_1431.9	1427	11.4	-1.07	0.663
unknown	NA102	1451.4	11.7	1.18	0.652
decanoate	Decanoic_acid_(1TMS)_1463.1	1459.7	11.9	1.85	0.451
2-methyl-malate	Malic_acid,_2-methyl-_(3TMS)_1473.53	1468.9	12	2.82	0.000256
N-acetylserine	Serine,_N-acetyl-_(2TMS)_1514.29	1506.5	12.6	9.36	0.00283
pyroglutamate	Pyroglutamic_acid_(1TMS)_1499.6	1509.9	12.7	1.57	0.129
aspartate	Aspartic_acid_(3TMS)_1520.9	1518.8	12.8	1.24	0.578
pyroglutamate	Pyroglutamic_acid_(2TMS)_1518.1	1522	12.8	1.04	0.868
cytosine	Cytosine_(2TMS)_1523.1	1523.2	12.8	-1.09	0.87
4-aminobutanoate	Butanoic_acid,_4-amino-_(3TMS)_1530.28	1528.5	12.9	-1.56	0.301
glutamate	Glutamic_acid_(2TMS)_1532.7	1535.2	13	1.11	0.462
phenylalanine	Phenylalanine_(1TMS)_1560	1549.9	13.2	-2.46	1.5e-07
3-hydroxybenzoate	Benzoic_acid,_3-hydroxy-_(2TMS)_1566.5	1568	13.5	-13.4	0.000168
6-hydroxynicotinate	Nicotinic_acid,_6-hydroxy-_(2TMS)_1583.98	1575.6	13.6	-3.98	0.000488
proline	Proline_[+CO2]_(2TMS)_1587.3	1583.6	13.7	-1.44	0.462
unknown	Unknown#1586.9-pae-bth_039	1590.2	13.8	-1.21	0.653
phosphoenolpyruvate	Phosphoenolpyruvic_acid_(3TMS)_1599.2	1600	13.9	-1.69	0.129
glutamate	Glutamic_acid_(3TMS)_1628.5	1623	14.2	-1.45	0.602
4-hydroxybenzoate	Benzoic_acid,_4-hydroxy-_(2TMS)_1631.79	1631.9	14.4	1.89	0.451
unknown	Unknown#1638.3-cgl-sst_041	1633.4	14.4	-1.84	0.483
1,2-diaminopropane	Propane,_1,2-diamino-_(4TMS)_1653.83	1644.3	14.5	-1.71	0.462
unknown	NA149	1649.8	14.6	-1.4	0.129
3-hydroxydecanoate	Decanoic_acid,_3-hydroxy-_(2TMS)_1659.8	1656.2	14.7	1.49	0.136
dodecanoate	Dodecanoic_acid_(1TMS)_1659.25	1658.1	14.7	1.62	0.0386
xylose/ribose/arabinose/…	Xylose_(1MEOX)_(4TMS)_MP_1653.4 (ribose, arabinose, ...)	1660.8	14.8	-1.32	0.737
pyrophosphate	Pyrophosphate_(4TMS)_1669.4	1662.3	14.8	-1.84	0.462
xylulose/ribulose/…	Xylulose_(1MEOX)_(4TMS)_MP_1685.1 (ribulose, ...)	1678.2	15	-1.33	0.805
2-dodecenoate	2-Dodecenoic-acid_1TMS_1715.5	1713.9	15.5	1.12	0.779
glycerol-2-phosphate	Glycerol-2-phosphate_(4TMS)_1732.4	1727.9	15.7	1.18	0.462
putrescine	Putrescine_(4TMS)_1739.36	1737.4	15.8	1.02	0.955
dihydroxyacetone phosphate	Dihydroxyacetone_phosphate_(1MEOX)_(3TMS)_BP_1764.8	1753.1	16	1.62	0.554
glycerol-3-phosphate	Glycerol-3-phosphate_(4TMS)_1767.8	1766.5	16.2	1.17	0.625
glucose	Glucopyranose_[-H2O]_(4TMS)_1763.61	1769.4	16.3	1.34	0.338
glycerate-3-phosphate	Glyceric_acid-2-phosphate_(4TMS)_1793.2	1779.3	16.4	-1.03	0.87
ethanolaminephosphate	Ethanolaminephosphate_(4TMS)_1787	1783.2	16.5	-1.16	0.318
N-acetyl-glutamate	Glutamic_acid,_N-acetyl-_(2TMS)_1788.4	1786.3	16.5	1.01	0.981
azelate	Azelaic_Acid_(2TMS)_1798.42	1798.8	16.7	-1.62	0.722
glycerate-1-phosphate	Glyceric_acid-3-phosphate_(4TMS)_1811	1808.1	16.8	-1.29	0.318
shikimate	Shikimic_acid_(4TMS)_1815.3	1810.6	16.8	#NUM!	0.000488
citrate	Citric_acid_(4TMS)_1825.5	1817.5	16.9	1.35	0.0844
3,4-dihydroxybenzoate	Benzoic_acid,_3,4-dihydroxy-_(3TMS)_1821.5	1818.5	17	-8	0.0111
fructose	Fructose,_D-_(5TMS)_1845.5	1857.8	17.5	-1.06	0.79
tyrosine	Tyrosine_(2TMS)_1882.5	1881.6	17.8	-4.43	0.00766
mannitol/sorbitol/galactitol	Mannitol_(6TMS)_1925.5 (sorbitol, galactitol, ...)	1925.5	18.4	3.23	2.02e-11
3-deoxyarabinoheptulosonate	Arabinoheptulosonic_acid_enol,_3-deoxy-_(5TMS)_MP_1933.32	1935.3	18.5	-1.86	0.000578
glucose	Glucopyranose,_D-_(5TMS)_1981.6	1975.7	19	1.72	0.048
unknown	Unknown#2018.7-pin-mhe_028	2016	19.5	1.36	0.143
unknown	Unknown#2013.24-ypy-mse_018	2017.1	19.5	1.27	0.451
unknown	NA321	2022.7	19.5	3.34	0.00192
hexadecanoate	Hexadecanoic_acid_(1TMS)_2047.1	2046.5	19.8	1.05	0.797
unknown	Unknown#2051.8-cgl-sst_001	2049.6	19.8	2.75	0.00191
N-acetyl-glucosamine	Glucosamine,_N-acetyl-_(1MEOX)_(4TMS)_2077	2071.3	20.1	1.19	0.663
xylulose-5-phosphate/ribose-5-phosphate/…	Xylulose-5-phosphate_(1MEOX)_(5TMS)_MP_2099.9 (ribose-5-phosphat, ...)	2100.1	20.4	1.3	0.625
unknown	NA374	2126	20.7	1.02	0.981
glycerophosphoglycerol	Glycerophosphoglycerol_(5TMS)_2190.4	2187.8	21.5	1.09	0.554
octadecenoate	Octadecenoic_acid,_9-(E)-_(1TMS)_2220.6	2221.5	21.8	1.01	0.981
shikimate-3-phosphate	Shikimic_acid-3-phosphate_(5TMS)_2216.26	2224.1	21.9	#NUM!	0.000578
octadecenoate	Octadecanoic_acid_(1TMS)_2250.63	2243.2	22	1.04	0.752
unknown	NA_2276.1	2271.2	22.3	-12.1	5.69e-08
fructose-1-phosphate	Fructose-1-phosphate_(1MEOX)_(6TMS)_MP_2292.4	2289.4	22.5	-1.13	0.834
fructose-6-phosphate	Fructose-6-phosphate_(1MEOX)_(6TMS)_MP_2308.33	2303.4	22.6	2.73	0.451
hexose-6-phosphate	Mannose-6-phosphate_(1MEOX)_(6TMS)_MP_2324.53 (hexose-6-phosphate)	2317.5	22.8	-1.27	0.073
hexose-6-phosphate	Glucose-6-phosphate_(1MEOX)_(6TMS)_BP_2340.2 (hexose-6-phosphate)	2337.3	23	-1.36	0.0508
unknown	NA454	2364.7	23.2	2.56	0.451
gluconate-6-phosphate	Gluconic_acid-6-phosphate_(7TMS)_2427.8	2423.2	23.8	-1.03	0.952
unknown	Unknown#2454.7-pin-mhe_060	2454.2	24.1	2.13	0.00766
myo-inositol-2-phosphate	Inositol-2-phosphate,_myo-_(7TMS)_2465.95	2470.3	24.3	-4.12	0.000349
myo-inositol-1-phosphate	Inositol-1-phosphate,_myo-_(7TMS)_2508.56	2513.5	24.7	2.42	0.462
unknown	Unknown#2551.4-cgl-sst_119	2550.1	25.1	1.44	0.0844
sedoheptulose-7-phosphate	Sedoheptulose-7-phosphate_(xMeOX)_(yTMS)_2555.17	2562.2	25.2	1.47	0.162
unknown	NA_2600.1	2594.7	25.5	1.39	0.382
unknown	Unknown#2590.91-ypy-mse_037	2594.8	25.5	-1.61	0.602
unknown	D260482_2610.31	2600.9	25.6	1.2	0.625
unknown	Unknown#2635-cgl-sst_121	2631.7	25.9	1.61	0.000137
unknown	NA540	2661.6	26.2	1.76	0.0981
1-oleoyl-rac-glycerol	1-Oleoyl-rac-glycerol_(2TMS)_2757.9	2759.9	27.1	-1.14	0.834
disaccharide	alpha-D-Galactopyranosyl-(1,4)-D-galactopyranoside_(1MEOX)_(8TMS)_BP_2790.07 (disaccharide)	2802	27.5	2.78	0.00192
disaccharide	Melibiose_(1MEOX)_(8TMS)_MP_2865.91 (disaccharide)	2859.5	28	1.33	0.474
UMP	Uridine_5'-monophosphate_(5TMS)_2872.1	2871.2	28.1	1.01	0.983
disaccharide	Melibiose_8TMS_2904.74 (disaccharide)	2898.3	28.3	4.35	0.17
AMP	Adenosine-5-monophosphate_(4TMS)_(Derivate_not_found)_3047.9	3052.9	29.6	1.14	0.76
AMP	Adenosine-5-monophosphate_(5TMS)_3061.8	3064.1	29.7	1.15	0.554
GMP	Guanosine-5-monophosphate_(6TMS)_3121.8	3116.8	30.1	1.36	0.451
unknown	NA820	3522.3	33.2	1.23	0.834
unknown	Unknown#3522.7-cgl-sst_133	3529.3	33.2	2.91	0.451
unknown	NA824	3547.5	33.4	2.08	0.533
trisaccharide	Cellotriose_(1MEOX)_(11TMS)_3649.07 (trisaccharide)	3641	34.1	2	0.462

## Sheet: Supplementary Table 2
Supplementary Table 2: Feature table of all annotated features of the LC-MS endometabolomics data.
identifier	median m/z	median retention time (min)	annotation	directional fold change	corrected p-value
M129T1	129.138	1	spermidine (fragment)	1.07	0.76
M146T1	146.165	1	spermidine	1.05	0.796
M179T1	179.055	1.2	gluconolactone	-1.57	9.75e-05
M116T1	116.07	1.2	proline	-1.21	0.119
M130T1_1	130.05	1.2	5-oxoproline	-1.16	0.285
M148T1	148.061	1.2	glutamate	-1.1	0.446
M118T1	118.086	1.3	betaine	1.5	7.44e-07
M325T1_1	325.043	1.3	UMP	1.25	0.113
M277T1_2	277.103	1.3	Glu Glu	-1.33	0.134
M324T1	324.059	1.3	CMP	1.2	0.147
M428T1	428.036	1.3	ADP	1.09	0.452
M124T1	124.039	1.4	nicotinate	-2.89	0.019
M535T1	535.188	1.4	Glu Glu Glu Glu	1.89	0.0523
M162T1	162.076	1.4	N-methylglutamate	1.25	0.103
M307T1	307.083	1.4	glutathion disulphide (2+)	-2.37	0.104
M235T1_2	235.119	1.4	His Pro (II)	1.05	0.491
M364T1	364.065	1.4	GMP	1.07	0.504
M348T1	348.071	1.4	AMP	1.08	0.612
M373T1_1	372.545	1.4	NADP (2+)	1.04	0.701
M136T1	136.062	1.4	adenine (AMP fragment)	1.06	0.697
M664T1_1	664.116	1.4	NAD	1.06	0.794
M333T1_1	332.562	1.4	NAD (2+)	1.02	0.894
M542T1	542.068	1.4	NAD (fragment)	1.02	0.904
M123T1_2	123.055	1.4	nicotinamide (NAD fragment)	1	0.983
M332T1	332.075	1.4	dAMP	1.01	0.953
M182T2	182.081	2	tyrosine	-3.4	0.000214
M132T2	132.102	2	Leucine / Isoleucine / Norleucine	-1.12	0.447
M235T2	235.119	2.1	His Pro (I)	1.11	0.0861
M193T2	193.068	2.5	S-(5'-adenosyl)-homocysteine (2+)	-1.03	0.806
M166T3	166.086	3.5	phenylalanine	-2.91	0.00511
M120T3	120.081	3.5	phenylethanolamine (Phe fragment)	-2.93	0.00539
M254T4	254.161	4.3	Pro Arg	1.11	0.469
M194T5	194.079	5.2	C4-HSL	1.34	1.8e-05
M220T5	220.118	5.2	panthotenate	1.42	0.00519
M188T6	188.071	5.9	tryptophan (fragment)	-1.19	0.274
M205T6	205.097	5.9	tryptophan	-1.17	0.365
M298T6	298.097	6.3	5'-methylthioadenosine	-1	0.973
M211T6	211.087	6.4	pyocyanin	-5.17	1.59e-10
M187T7	187.123	6.5	putative virulence marker	-5.44	0.000107
M348T7	348.07	6.9	AMP (FMN fragment)	-1.09	0.0956
M786T7	786.164	6.9	FAD	-1.1	0.151
M120T7	120.044	7	anthranilate (fragment)	-1.95	3.45e-08
M160T7	160.076	7.1	C1-HQ	-2.9	1.07e-10
M457T7	457.112	7.1	FMN	-1.29	3.32e-05
M328T7	328.223	7.3	Pro Leu Val	-1.11	0.253
M342T8	342.239	7.8	Pro Ile Leu or isomer	1.03	0.718
M162T8	162.055	8.3	DHQ	-4.29	1.44e-07
M245T9	245.128	8.6	Phe Pro	1.09	0.173
M188T9	188.107	8.8	C3-HQ	-5.61	5.34e-09
M243T9	243.088	9.2	lumichrome	1.17	0.127
M224T11	224.082	10.6	phenanzine-1-carboxamide	-5.27	1.15e-05
M207T11_2	207.055	10.6	phenazine-1-carboxamide (fragment)	-5.21	1.95e-05
M197T11	197.071	10.9	1-hydroxyphenazine	-9.78	3.81e-12
M214T11	214.123	10.9	C5:1-HQ	-3.46	4.94e-11
M216T11	216.139	11	C5-HQ	-3.01	2.84e-11
M232T11	232.133	11.3	C5-QNO	-1.73	8.28e-09
M207T11_1	207.055	11.4	phenazine-1-carboxylic acid (fragment)	-21.2	1.19e-08
M225T11_1	225.066	11.4	phenazin-1-carboxylic acid	-19.5	1.19e-08
M269T12	269.056	11.6	phenazin-1,6-dicarboxylic acid	-2.22	5.36e-09
M325T12_1	325.068	11.6	pyochelin (II)	1.93	4.29e-05
M230T12	230.154	12	C6-HQ	-1.52	6.5e-05
M325T12_2	325.068	12.3	pyochelin (I)	2.76	7.08e-07
M270T13	270.185	12.6	C9:1-HQ (I)	-3.04	1.63e-10
M288T13	288.196	12.6	C9-QNO (I)	-2.61	6.75e-10
M258T13	258.149	12.7	C7:1-QNO	-2.04	4.88e-09
M242T13	242.154	13	C7:1-HQ	-1.81	2.1e-08
M159T13	159.068	13	HHQ (fragment)	-1.74	6.47e-08
M244T13_1	244.17	13	HHQ	-1.22	3.3e-06
M260T13	260.165	13.1	C7-QNO	-1.58	9.28e-09
M519T13	519.322	13.1	HQNO [2M+H]+	-2.26	1.81e-08
M272T14_1	272.165	13.5	C8:1-QNO	-1.89	2.48e-08
M314T14	314.212	13.6	C11:1-QNO	-4.02	3.05e-09
M286T14_2	286.181	13.9	C9:1-QNO (I)	-1.77	1.8e-07
M256T14_2	256.17	13.9	C8:1-HQ	-1.29	0.0057
M274T14	274.18	14	C8-QNO	-2.32	2.54e-10
M258T14	258.186	14	C8-HQ	-1.65	1.74e-05
M320T14	320.183	14.2	C12-HSL	-1.53	1.65e-05
M296T14	296.201	14.3	C11:2-HQ (II)	-1.91	2.58e-07
M268T14	268.17	14.3	C9:2-HQ	-1.3	0.00318
M316T14_2	316.228	14.4	C11-QNO	-4.38	1.13e-11
M286T14_1	286.181	14.4	C9:1-QNO (II)	-1.55	5.54e-07
M284T15	284.202	14.7	C10:1-HQ (II)	-2.1	4.53e-08
M300T15_1	300.196	14.7	C10:1-QNO	-1.82	6.82e-07
M270T15_1	270.186	14.8	C9:1-HQ (II)	-1.26	1.51e-05
M288T15	288.196	14.9	C9-QNO (II)	-1.28	5.94e-08
M342T15	342.243	15	C13:1-QNO	-6.56	1.2e-09
M452T15	452.278	15	LPE(16:1)	-1.09	0.418
M260T15	260.165	15.2	PQS	-2.46	0.065
M286T15	286.181	15.3	C9:1-PQS	-1.15	0.516
M314T16_1	314.212	15.5	C11:1-PQS (I)	-1.82	7.23e-11
M298T16_1	298.217	15.5	C11:1-HQ (II)	-1.77	1.49e-06
M505T16	505.253	15.6	LPE(16:1) +Na	-1.01	0.965
M286T16	286.217	15.7	C10-HQ	-2.85	3.04e-11
M296T16	296.201	15.7	C11:2-HQ (I)	-2.81	4.26e-09
M302T16_2	302.212	15.7	C10-QNO	-2.78	1.13e-09
M284T16	284.201	15.7	C10:1-HQ (I)	-2.16	1.48e-08
M272T16_2	272.201	15.7	C9-HQ	-1.68	2.32e-06
M673T16	673.378	15.9	Rha-Rha-C10-C10+Na	1.09	0.114
M651T16	651.396	15.9	Rha-Rha-C10-C10	1.13	0.217
M314T16_2	314.212	16	C11:1-PQS (I)	-2.19	4.82e-09
M298T16_2	298.217	16.2	C11:1-HQ (I)	-2.41	5.82e-09
M312T16_2	312.233	16.3	C12:1-HQ (I)	-3.77	1.84e-11
M328T16	328.228	16.3	C12:1-QNO	-2.49	4.31e-09
M454T16	454.293	16.3	LPE(16:0)	1.08	0.186
M316T17	316.228	16.5	C11-PQS	-1.84	6.87e-10
M298T17_1	298.217	16.6	C11:1-HQ (III)	-1.62	2.73e-05
M527T17	527.32	16.7	Rha-C10-C10+Na	1.26	0.0023
M699T17_2	699.393	16.7	Rha-Rha-C10-C12:1 / Rha-Rha-C12:1-C10 +Na	1.11	0.0414
M677T17	677.411	16.7	Rha-Rha-C10-C12:1 / Rha-Rha-C12:1-C10	1.12	0.312
M326T17_1	326.248	17	C13:1-HQ (I)	-4.12	4.02e-12
M502T17	502.291	17.1	LPE(18:1) +Na	1.24	0.000354
M480T17_1	480.309	17.1	LPE(18:1)	1.2	0.00539
M701T17_2	701.409	17.2	Rha-Rha-C10-C12+Na	1.08	0.177
M679T17	679.427	17.2	Rha-Rha-C10-C12 / Rha-Rha-C12-C10	1.14	0.226
M312T17	312.233	17.4	C12:1-HQ (II)	-3.94	3.9e-11
M553T17	553.336	17.5	Rha-C10-C12:1+Na	1.1	0.294
M342T18	342.243	17.7	C13:1-PQS	-2.21	7.55e-08
M727T18	727.424	17.9	Rha-Rha-C12-C12:1+Na	-1.1	0.336
M705T18	705.442	17.9	Rha-Rha-C12:1-C12 / Rha-Rha-C12-C12:1	-1.06	0.644
M555T18_2	555.351	18.1	Rha-C10-C12+Na (II)	1.01	0.877
M328T18	328.264	18.3	C13-HQ	-3.62	1.97e-10
M326T18	326.248	18.3	C13:1-HQ (II)	-2.81	2.47e-08
M370T19	370.274	18.5	C15:1-QNO	-2.69	3.8e-10
M255T18	255.232	18.5	palmitoleate	1.02	0.924
M707T19	707.458	18.6	Rha-Rha-C12-C12	-1.06	0.319
M555T19	555.357	18.9	Rha-C10-C12+Na (I)	1.58	1.69e-06
M282T19_2	282.279	19.1	petroselinate	-1	0.996
M257T20	257.248	19.6	palmitate	-1.05	0.746
M327T20	327.227	19.8	oleate	1.06	0.765

## Sheet: Supplementary Table 3
Supplementary Table 3: Feature table of all annotated features of the LC-MS exometabolomics data.
identifier	median m/z	median retention time (min)	annotation	directional fold change	corrected p-value
M112T1_2	112.112	1	spermidine (fragment)	2.07	0.000406
M146T1_3	146.165	1	spermidine	1.66	0.00179
M129T1_2	129.138	1	spermidine (fragment)	1.87	0.000884
M179T1	179.055	1.2	gluconolactone	-2.26	7.69e-06
M162T1	162.076	1.2	N-methylglutamate	1.03	0.762
M130T1_1	130.05	1.2	5-oxoproline	-1.02	0.786
M118T1	118.086	1.3	betaine	1.28	0.00374
M219T1_3	219.097	1.3	Glu Ala	1.26	0.0024
M307T1	307.083	1.4	glutathion disulphide (2+)	7.54	1.18e-08
M136T1	136.062	1.4	adenine (AMP fragment)	1.29	0.00915
M137T1	137.046	1.4	hypoxanthine	-1.63	3.69e-05
M110T1	110.06	1.4	2-aminophenol	-1.92	0.0011
M235T1_2	235.119	1.4	His Pro (II)	-1.45	0.000171
M333T1_1	332.562	1.4	NAD (2+)	-1.58	0.0053
M664T1	664.115	1.4	NAD	-1.53	0.0248
M348T1_1	348.07	1.4	AMP	-1.37	0.039
M182T2	182.081	2	tyrosine	-9.42	8.9e-08
M235T2	235.119	2.1	His Pro (I)	-1.62	9.42e-05
M166T3	166.086	3.4	phenylalanine	-2.02	4.77e-06
M120T3	120.081	3.4	phenylethanolamine (Phe fragment)	-2.06	1.39e-05
M254T4	254.161	4.3	Pro Arg	-1.54	3.8e-07
M194T5	194.079	5.2	C4-HSL	1.12	0.00766
M220T5	220.118	5.2	panthotenate	-1.3	0.0101
M298T6_1	298.096	6.3	5'-methylthioadenosine	-1.05	0.398
M211T6	211.087	6.4	pyocyanin (I)	-5.91	5.04e-08
M187T7	187.123	6.6	putative virulence marker	-2.81	0.0155
M378T7	378.201	6.6	Pro Tyr Val	-1.18	0.0753
M190T7	190.049	6.7	kynurenate	-1.32	0.00277
M138T7	138.055	6.9	anthranilate	-3	1.36e-08
M211T7_1	211.087	7	pyocyanin (II)	-5.77	7.2e-08
M120T7	120.044	7	anthranilate (fragment)	-3.34	1.6e-08
M160T7	160.076	7.1	C1-HQ	-2.78	4.31e-09
M328T7_2	328.223	7.3	Pro Leu Val	-1.77	5.15e-06
M211T7_2	211.087	7.4	pyocyanin (III)	-7.13	1.72e-07
M342T8	342.238	7.8	Pro Ile Leu or isomer	-1.62	1.71e-06
M211T8_2	211.144	8.1	cyclo(Leu Pro)	-1.2	0.00451
M162T8	162.055	8.4	DHQ	-1.68	0.000839
M245T9	245.129	8.6	Phe Pro	-1.21	0.00423
M188T9	188.107	8.8	C3-HQ	-5.28	3.73e-08
M243T9_2	243.087	9.2	lumichrome	2.41	6.42e-06
M224T11_2	224.082	10.6	phenanzine-1-carboxamide	-9.49	2.73e-08
M260T11	260.165	10.8	HQNO	-2.36	3.73e-08
M214T11	214.123	10.9	C5:1-HQ	-3.09	3.35e-08
M197T11	197.071	10.9	1-hydroxyphenazine	-8.16	3.12e-05
M216T11	216.138	11	C5-HQ	-2.62	2.02e-08
M232T11	232.133	11.3	C5-QNO	-1.74	1.85e-07
M225T11_1	225.066	11.4	phenazin-1-carboxylic acid (I)	-12.7	6.95e-09
M207T11	207.055	11.4	phenazine-1-carboxylic acid (fragment) (I)	-15.7	4.38e-08
M325T12_2	325.068	11.6	pyochelin (II)	1.81	2.3e-05
M269T12	269.055	11.6	phenazin-1,6-dicarboxylic acid	-6.79	5.32e-07
M225T12	225.066	11.9	phenazin-1-carboxylic acid (II)	-16.7	1.3e-08
M207T12_2	207.055	11.9	phenazine-1-carboxylic acid (fragment) (II)	-18.4	2.55e-08
M286T12	286.18	12	C9:1-QNO (I)	-1.67	4.37e-09
M230T12	230.154	12.1	C6-HQ	1.11	0.0505
M325T12_1	325.068	12.3	pyochelin (I)	2.63	1.21e-08
M260T12	260.164	12.4	C7-QNO (II)	1.5	0.086
M270T13	270.185	12.7	C9:1-HQ (I)	-2.59	6.57e-10
M288T13	288.196	12.7	C9-QNO (I)	-2.41	4.19e-09
M258T13	258.149	12.7	C7:1-QNO	-1.87	5.02e-08
M242T13	242.154	13	C7:1-HQ	-1.31	1.64e-05
M244T13_1	244.17	13.1	HHQ	-1.27	2.23e-07
M159T13	159.068	13.1	HHQ (fragment)	-1.45	8.96e-08
M260T13_1	260.165	13.2	C7-QNO (I)	-1.24	2.3e-06
M519T13	519.322	13.2	HQNO [2M+H]+	-1.28	0.0104
M296T14_2	296.2	13.6	C11:2-HQ (I)	-6	1.22e-10
M314T14_1	314.212	13.6	C11:1-QNO	-4.25	4.86e-09
M272T14	272.164	13.6	C8:1-QNO	-1.46	3.41e-05
M256T14_2	256.169	14	C8:1-HQ	1.34	0.00902
M258T14	258.185	14	C8-HQ	-1.17	0.0297
M274T14	274.18	14.1	C8-QNO	-1.62	0.00209
M320T14	320.183	14.2	C12-HSL	2.45	1.12e-06
M296T14_1	296.2	14.3	C11:2-HQ (III)	-1.56	2.31e-05
M316T14_2	316.227	14.4	C11-QNO	-4.99	3.12e-08
M286T14	286.18	14.4	C9:1-QNO (II)	-1.55	0.000251
M268T14	268.17	14.4	C9:2-HQ	-1.33	0.0616
M300T15	300.195	14.7	C10:1-QNO	-1.76	0.000143
M260T15_1	260.164	14.7	PQS (II)	-1.13	0.208
M284T15	284.201	14.8	C10:1-HQ	-2.58	6.52e-06
M272T15_2	272.201	14.9	C9-HQ	-1.37	3.8e-05
M288T15_2	288.196	14.9	C9-QNO (II)	-1.21	0.0205
M270T15_1	270.185	14.9	C9:1-HQ (II)	-1.17	0.167
M342T15	342.242	15	C13:1-QNO	-7.7	2.69e-07
M260T15_2	260.165	15.3	PQS (I)	-1.8	0.0105
M286T15	286.18	15.3	C9:1-PQS	-1.72	0.0468
M314T16_1	314.212	15.5	C11:1-PQS (II)	-2.41	3.66e-05
M298T16	298.217	15.6	C11:1-HQ (I)	-4.16	1.93e-07
M296T16	296.201	15.7	C11:2-HQ (II)	-3.89	2.55e-07
M286T16	286.216	15.8	C10-HQ	-2.52	2.28e-05
M302T16	302.211	15.8	C10-QNO	-2.12	0.00286
M314T16_2	314.211	16.1	C11:1-PQS (I)	-2.76	1.35e-05
M328T16	328.227	16.3	C12:1-QNO	-3.4	1.21e-05
M312T16	312.232	16.4	C12:1-HQ (I)	-5.67	5.78e-07
M677T17	677.41	16.6	Rha-Rha-C10-C12:1 / Rha-Rha-C12:1-C10	-1.34	1.9e-07
M699T17_3	699.393	16.6	Rha-Rha-C10-C12:1 / Rha-Rha-C12:1-C10 +Na	-1.31	4.48e-07
M316T17	316.227	16.6	C11-PQS	-2.22	0.00107
M298T17_1	298.217	16.7	C11:1-HQ (II)	-2.87	1.07e-05
M342T17_1	342.242	17	C13:1-PQS	-3.35	4.17e-05
M326T17_1	326.248	17.1	C13:1-HQ (I)	-5.58	5.2e-07
M679T17	679.427	17.2	Rha-Rha-C10-C12 / Rha-Rha-C12-C10	-1.15	0.00683
M553T17	553.335	17.4	Rha-C10-C12:1+Na	-1.24	0.00317
M312T18	312.232	17.5	C12:1-HQ (II)	-2.19	0.000265
M705T18	705.44	17.9	Rha-Rha-C12:1-C12 / Rha-Rha-C12-C12:1	-1.32	0.0595
M555T18	555.351	18	Rha-C10-C12+Na	-1.21	0.0119
M328T18	328.264	18.4	C13-HQ	-4.22	2.64e-06
M326T18	326.248	18.4	C13:1-HQ (II)	-3.5	4.71e-06
M707T19	707.457	18.5	Rha-Rha-C12-C12	-1.05	0.719
M729T19	729.439	18.5	Rha-Rha-C12-C12+Na	-1.11	0.379
M370T19	370.274	18.6	C15:1-QNO	-2.89	0.000515
M282T19_2	282.279	19.1	petroselinate	-1.07	0.551
M257T20	257.247	19.6	palmitate	-1.1	0.362
